# Supplementary material
Source: PubMed Central journal article supplement (PMC8986055)

Supplementary data

Supplementary Table 1: Genes targeted by next-generation sequencing analysis

| No. | Gene    | Disease                      | No. | Gene           | Disease                                                                               |
|-----|---------|------------------------------|-----|----------------|---------------------------------------------------------------------------------------|
| 1   | SLC12A1 | Type 1 Bartter               | 61  | MUC1           | MCKD, ADTKD                                                                           |
| 2   | KCNJ1   | Type 2 Bartter               | 62  | SEC61A1        | Autosomal-dominant tubulo-interstitial and glomerulocystic kidney disease with anemia |
| 3   | CLCNKB  | Type 3 Bartter               | 63  | REN            | ADTKD                                                                                 |
| 4   | BSND    | Type 4a Bartter              | 64  | EYA1           | BOR                                                                                   |
| 5   | CLCNKA  | Type 4b Bartter              | 65  | SIX2           | BOR                                                                                   |
| 6   | SLC12A3 | Gitelman                     | 66  | CD2AP          | FSGS                                                                                  |
| 7   | CASR    | Hypocalcemia                 | 67  | NPHS1          | FSGS/CNS                                                                              |
| 8   | MAGED2  | Type 5 Bartter               | 68  | NPHS2          | FSGS/CNS                                                                              |
| 9   | CLDN10  | Salt-losing tubulopathy      | 69  | PLCE1 (NPHS3)  | FSGS/CNS                                                                              |
| 10  | CFTR    | Cystic fibrosis              | 70  | SMARCAL1       | FSGS                                                                                  |
| 11  | CLCN5   | Dent-1                       | 71  | LAMB2          | FSGS                                                                                  |
| 12  | OCRL    | Dent-2                       | 72  | SCARB2         | FSGS                                                                                  |
| 13  | SLC26A3 | Congenital chloride diarrhea | 73  | COQ2           | FSGS                                                                                  |
| 14  | KCNJ10  | EAST syndrome                | 74  | COQ6           | FSGS                                                                                  |
| 15  | CLDN16  | Hypomagnesemia               | 75  | ITGA3          | FSGS                                                                                  |
| 16  | CLDN19  | Hypomagnesemia               | 76  | ITGB4          | FSGS                                                                                  |
| 17  | FXYP2   | Hypomagnesemia               | 77  | GLEPP1 (PTPRO) | FSGS                                                                                  |
| 18  | EGF     | Hypomagnesemia               | 78  | MYO1E          | FSGS                                                                                  |
| 19  | TRPM6   | Hypomagnesemia               | 79  | ARHGDI1        | FSGS                                                                                  |
| 20  | KCNA1   | Hypomagnesemia               | 80  | ADCK4          | FSGS                                                                                  |
| 21  | CNNM2   | Hypomagnesemia               | 81  | TTC21B         | FSGS                                                                                  |
| 22  | HNF1B   | Hypomagnesemia               | 82  | NUP93          | FSGS                                                                                  |
| 23  | PCBD1   | Hypomagnesemia               | 83  | NUP107         | FSGS                                                                                  |

|    |            |                                    |     |          |                          |
|----|------------|------------------------------------|-----|----------|--------------------------|
| 24 | CFH        | aHUS                               | 84  | NUP205   | FSGS                     |
| 25 | CFI        | aHUS                               | 85  | NUP85    | FSGS                     |
| 26 | MCP (CD46) | aHUS                               | 86  | NUP133   | FSGS                     |
| 27 | C3         | aHUS                               | 87  | NUP160   | FSGS                     |
| 28 | CFB        | aHUS                               | 88  | CRB2     | FSGS                     |
| 29 | DGKE       | aHUS FSGS                          | 89  | CUBN     | FSGS                     |
| 30 | THBD       | aHUS                               | 90  | EMP2     | FSGS                     |
| 31 | CFHR1      | aHUS                               | 91  | FAT1     | FSGS                     |
| 32 | ADAMTS13   | TTP                                | 92  | KANK1    | FSGS                     |
| 33 | FN1        | Fibronectin                        | 93  | KANK2    | FSGS                     |
| 34 | SLC4A1     | Distal RTA                         | 94  | KANK4    | FSGS                     |
| 35 | ATP6V0A4   | Distal RTA                         | 95  | PDSS2    | FSGS                     |
| 36 | ATP6V1B1   | Distal RTA                         | 96  | PTPRO    | FSGS                     |
| 37 | SLC4A4     | Proximal RTA                       | 97  | XPO5     | FSGS                     |
| 38 | CA2        | Mixed RTA                          | 98  | ACTN4    | FSGS (AD)                |
| 39 | EHHADH     | Fanconi syndrome<br>(OMIM #615605) | 99  | ANLN     | FSGS (AD)                |
| 40 | SLC34A1    | Fanconi syndrome<br>(OMIM #613388) | 100 | ARHGAP24 | FSGS (AD)                |
| 41 | SLC2A2     | Fanconi-Bickel                     | 101 | INF2     | FSGS (AD)                |
| 42 | BCS1L      | Fanconi syndrome                   | 102 | LMX1B    | FSGS (AD)                |
| 43 | CTNS       | Cystinemia                         | 103 | MYH9     | MYH9<br>nephropathy (AD) |
| 44 | NR3C2      | PHA type 1                         | 104 | PAX2     | FSGS (AD)                |
| 45 | SCNN1A     | PHA type 1                         | 105 | TRPC6    | FSGS (AD)                |
| 46 | SCNN1B     | PHA type 1                         | 106 | WT1      | FSGS/CNS                 |
| 47 | SCNN1G     | PHA type 1                         | 107 | WDR73    | FSGS, Galloway-<br>Mowat |
| 48 | KLHL3      | PHA type 1                         | 108 | MAGI2    | Nephrotic<br>syndrome    |
| 49 | CUL3       | PHA type 1                         | 109 | AVIL     | Nephrotic<br>syndrome    |
| 50 | WNK1       | PHA type 2                         | 110 | TNS2     | Nephrotic<br>syndrome    |
| 51 | WNK4       | PHA type 2                         | 111 | DLC1     | Nephrotic                |

|    |        |                                         |     |         |                               |
|----|--------|-----------------------------------------|-----|---------|-------------------------------|
|    |        |                                         |     |         | syndrome                      |
| 52 | AQP2   | Nephrogenic diabetes insipidus, type II | 112 | CDK20   | Nephrotic syndrome            |
| 53 | AVPR2  | Nephrogenic diabetes insipidus, type I  | 113 | ITSN1   | Nephrotic syndrome            |
| 54 | AVP    | Central diabetes insipidus              | 114 | ITSN2   | Nephrotic syndrome            |
| 55 | COL4A3 | Alport syndrome                         | 115 | KIRREL1 | Nephrotic syndrome            |
| 56 | COL4A4 | Alport syndrome                         | 116 | SGPL1   | Congenital nephrotic syndrome |
| 57 | COL4A5 | Alport syndrome                         | 117 | LMNA    | FSGS(AD)                      |
| 58 | COL4A1 | Hematuria, CAKUT                        | 118 | LAMA5   | Nephrotic syndrome            |
| 59 | GLA    | Fabry disease                           | 119 | GAPVD1  | Nephrotic syndrome            |
| 60 | UMOD   | MCKD, ADTKD                             | 120 | ANKFY1  | SRNS                          |
|    |        |                                         | 121 | GON7    | Galloway-Mowat                |
|    |        |                                         | 122 | LAGE3   | Galloway-Mowat                |
|    |        |                                         | 123 | OSGEP   | Galloway-Mowat                |
|    |        |                                         | 124 | TPRKB   | Galloway-Mowat                |
|    |        |                                         | 125 | TP53RK  | Galloway-Mowat                |
|    |        |                                         | 126 | NUP133  | Galloway-Mowat                |
|    |        |                                         | 127 | WDR4    | Galloway-Mowat                |
|    |        |                                         | 128 | WDR73   | Galloway-Mowat                |



Supplementary Figure 1

Direct sequencing for transcript analysis

① The single band shown in the control (Co) and the upper band shown in patient (Pt) corresponded to exon 8, exon 9 and 10; the splicing pattern was normal.

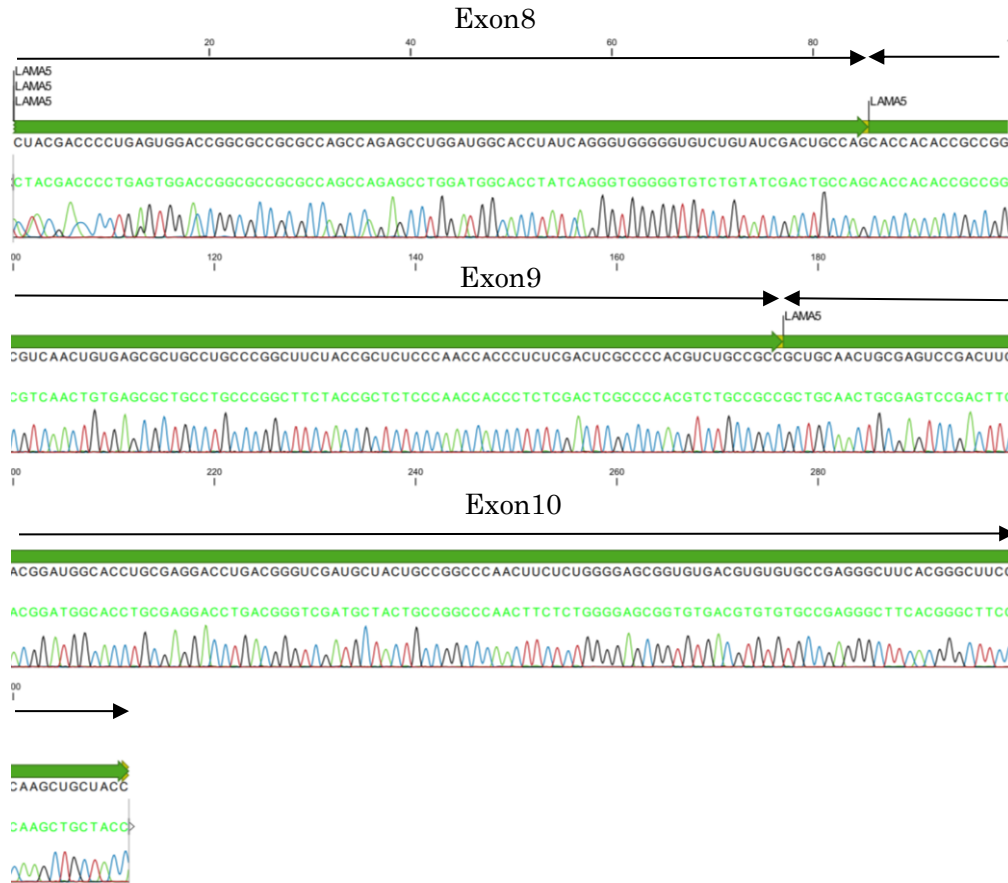

② The lower band shown in Pt corresponded to exon 8 and exon 10; exon 9 skipping occurred.

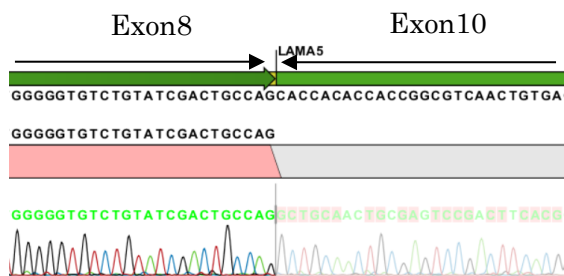

Supplement: 7727_2_supp_92111_r0j4w2.pdf [file 7727_2_supp_92111_r0j4w2.pdf]
